# Supplementary material for: Functional Annotation of Genetic Loci Associated With Sepsis Prioritizes Immune and Endothelial Cell Pathways
Source: Front Immunol. 2019 Aug 14;10:1949. doi: 10.3389/fimmu.2019.01949 (PMC6703137; doi:10.3389/fimmu.2019.01949)
Supplement: Supplementary file 1 [file Data_Sheet_1.xlsx]

## Sheet: Sheet1
Supplementary table 1: Number of suggestive GWAS loci associated with sepsis survivals and sepsis onset in three cohorts (P value<=10e-5). * among these 11 SNPs, there is one SNP reached GWAS significant threshold (rs4957796).
	Rautanen A et al	Scherag A et al	Srinivasan L et al
Cohort description	28 days survivals of sepsis patients with pneumonia	28 days survivals of sepsis patients	Sepsis onset in extremely premature infants
Discovery cohort	Total N= 1553	Total N= 740	Total= 757
	Death= 359	Death= 149	Sepsis= 351
	Survivor= 1194	Survivor= 591	No sepsis= 406
Replication cohort	Total N= 538	Total N= 936	None
	Death= 106	Death= 95
	Survivor= 432	Survivor= 841
Reported SNPs (P<= 10e-5)	11*	14	30
Independent loci (1MB window)	9	14	16
Proxy SNPs (R2>=0,95 &D’=1)	28	122	68
